# Supplementary material for: CCL2 as a potential therapeutic target for clear cell renal cell carcinoma
Source: PubMed Central journal article supplement (PMC5083746; doi:10.1002/cam4.886), 2016-09-26

Figure S1

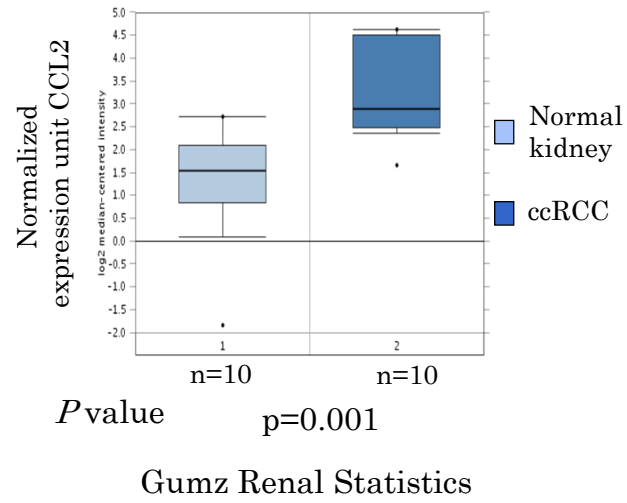

Figure S2

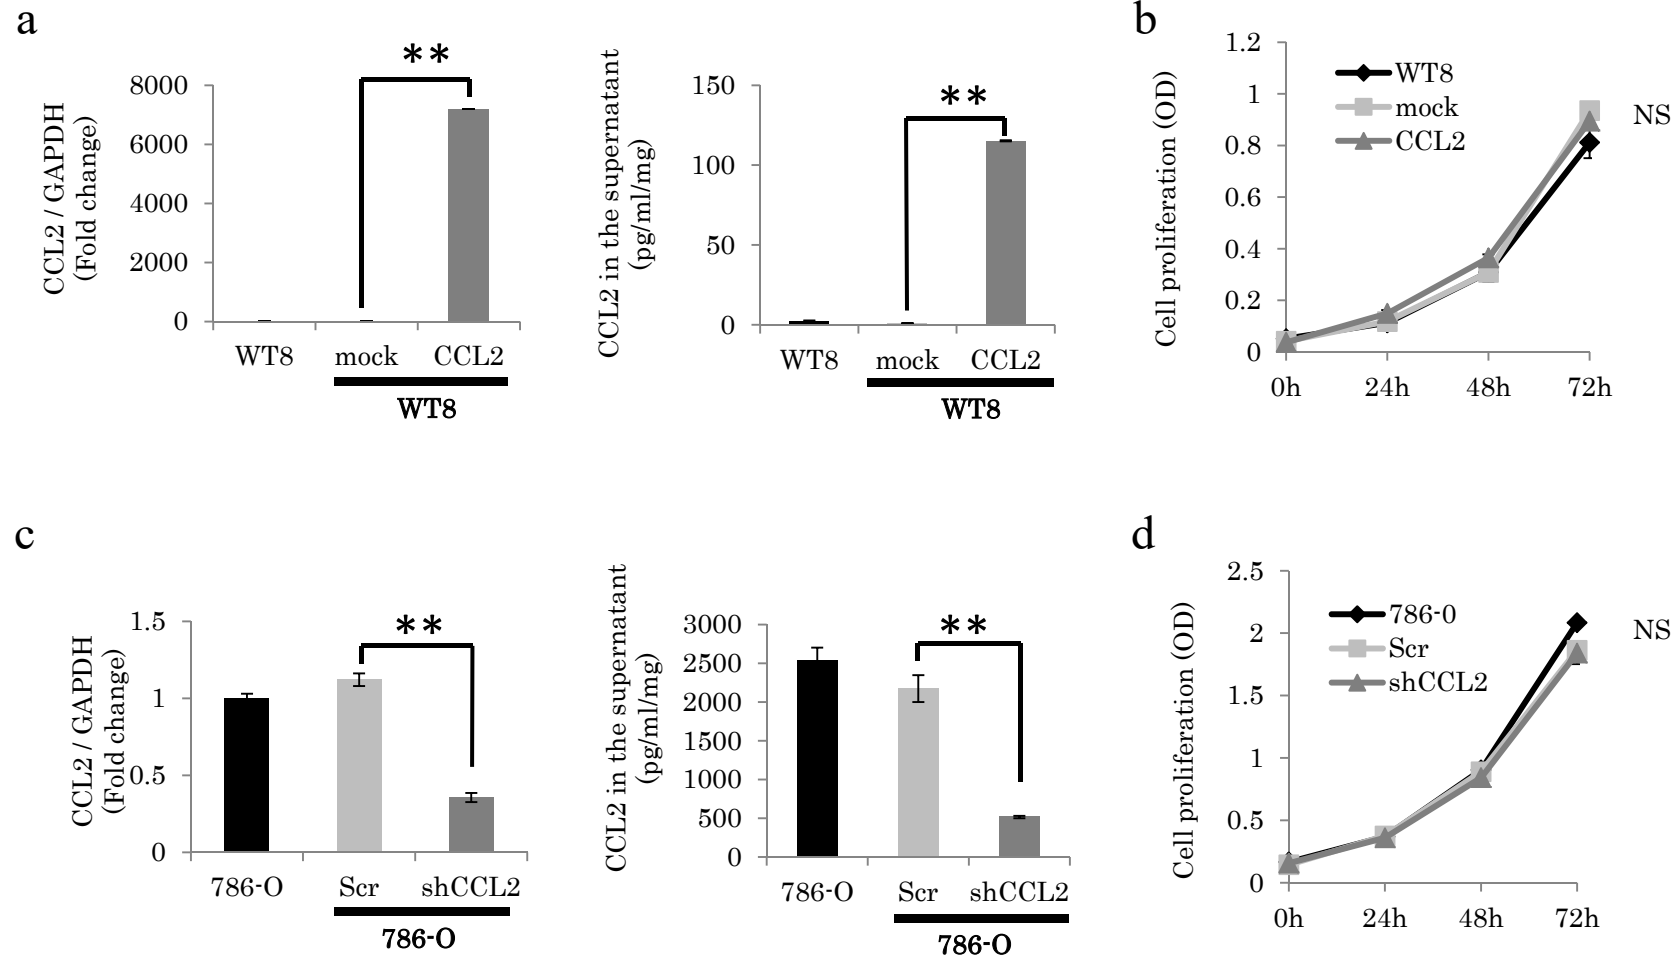

Figure S3

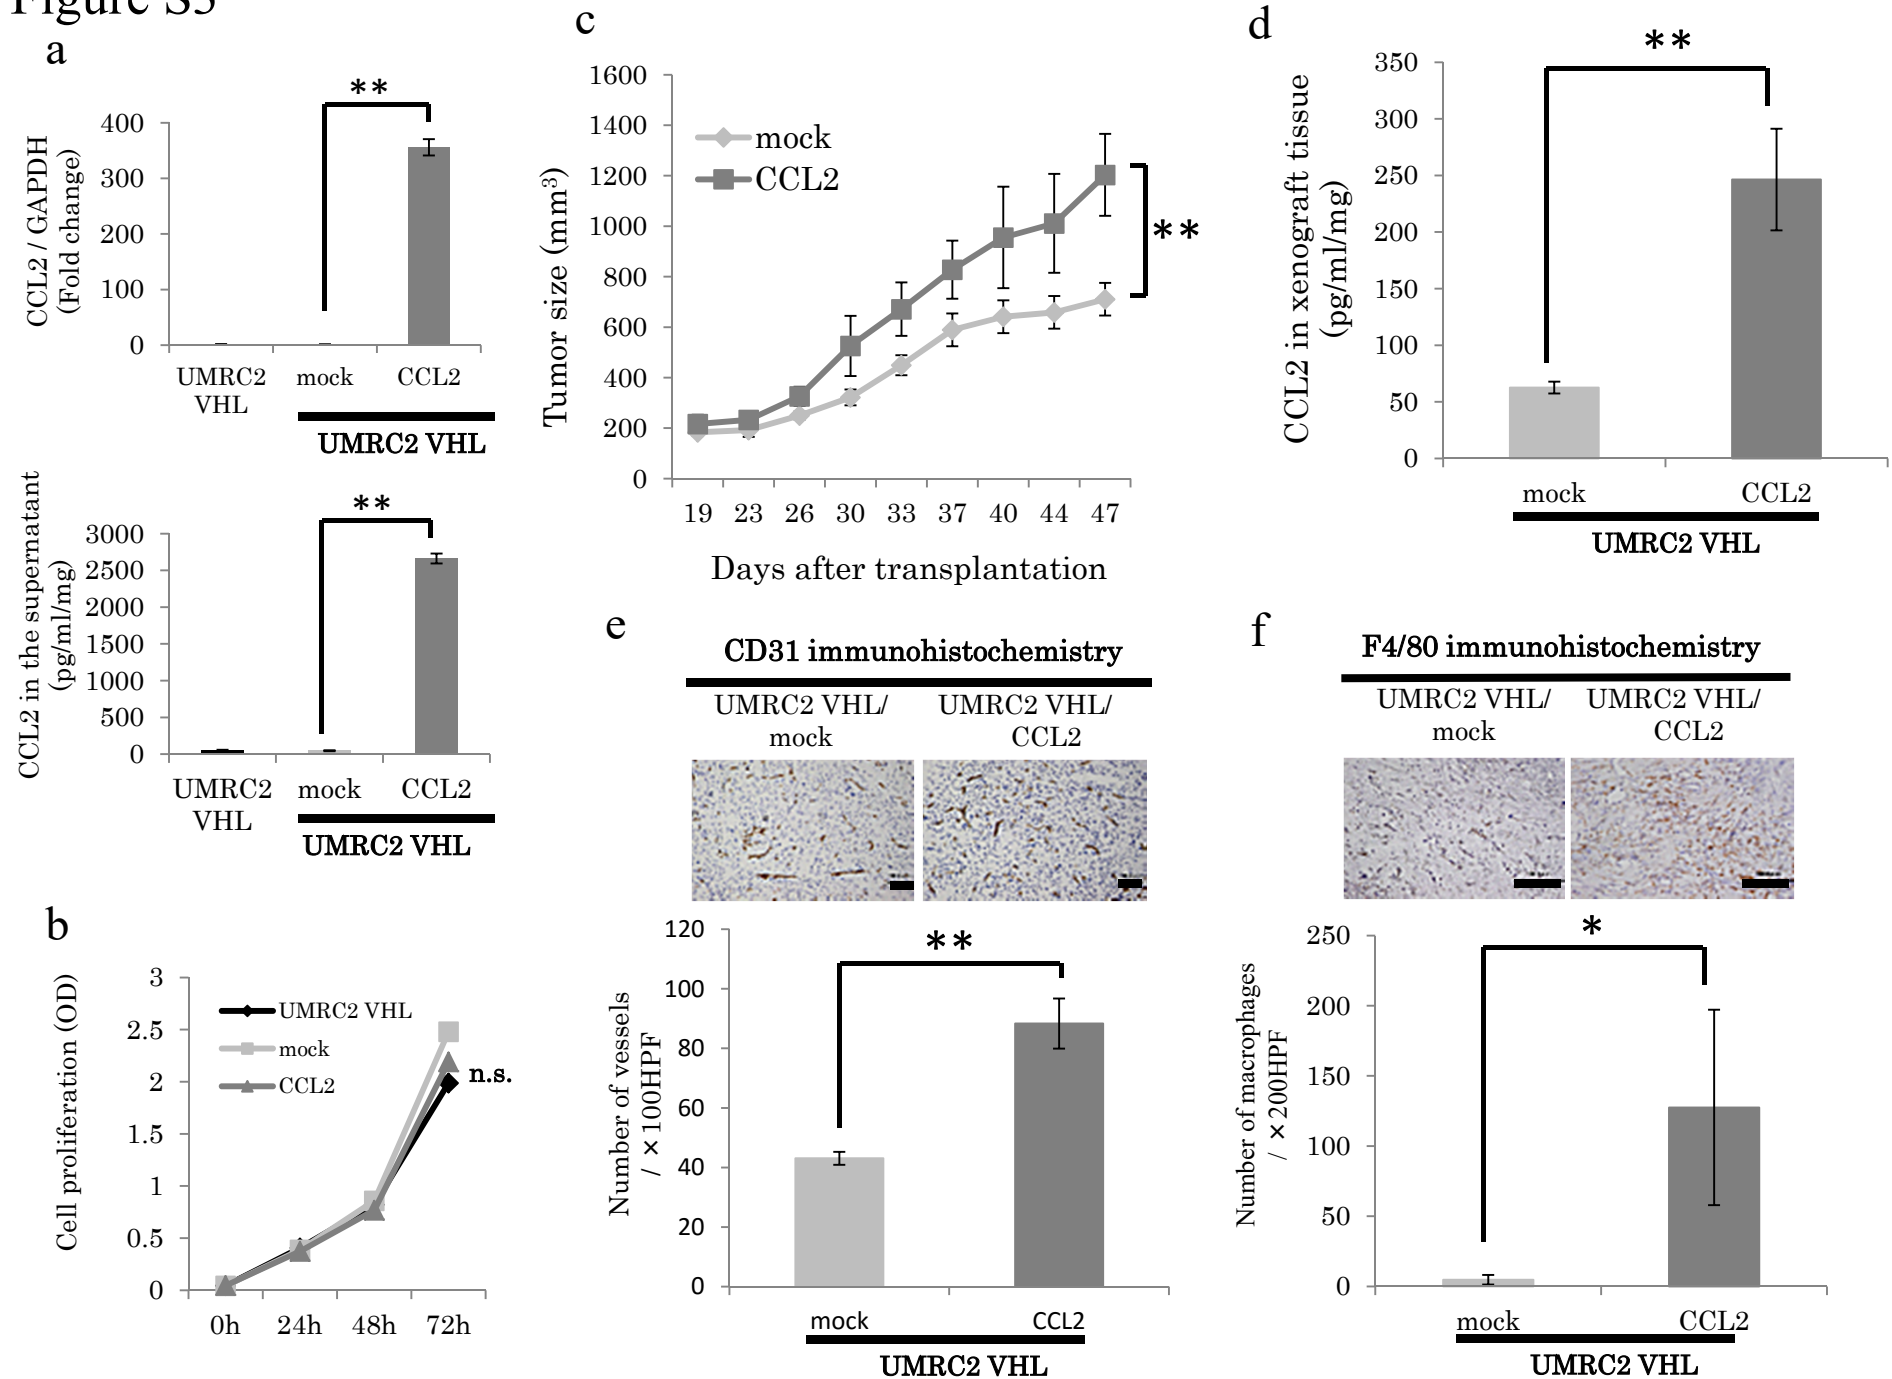

Figure S4

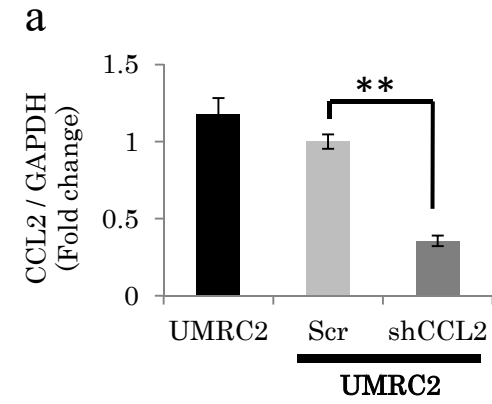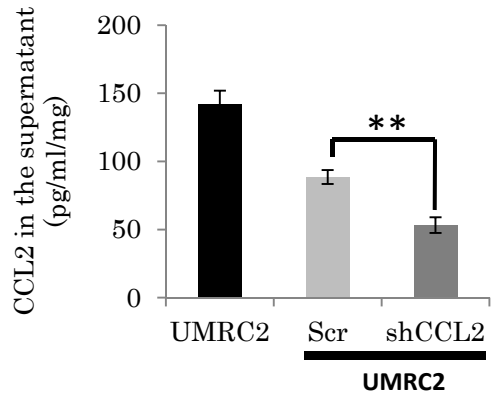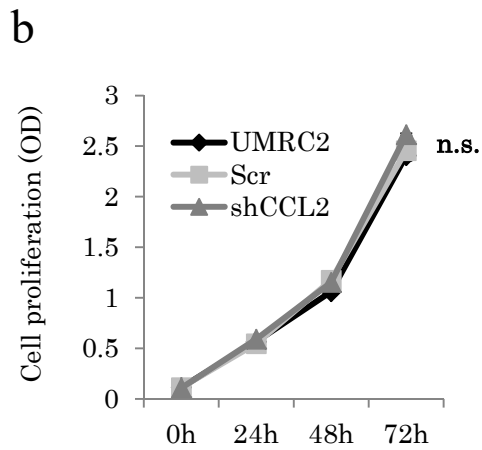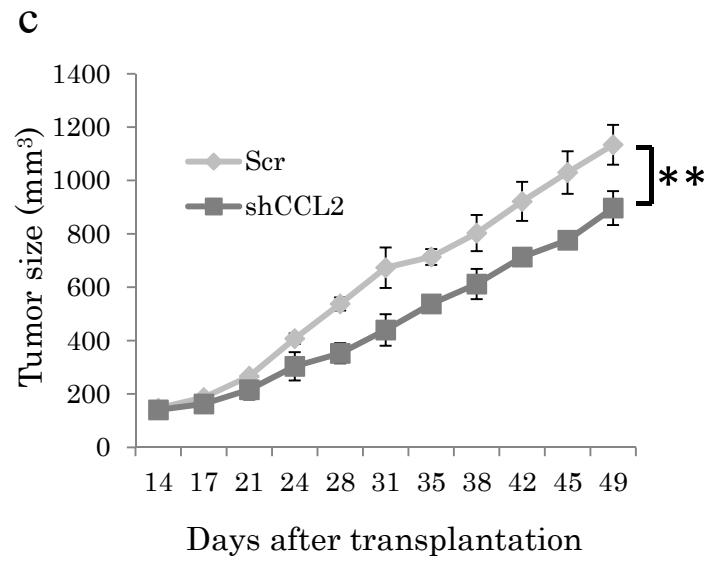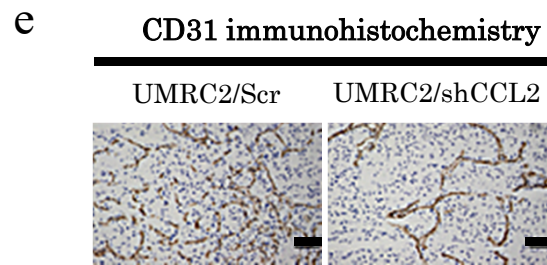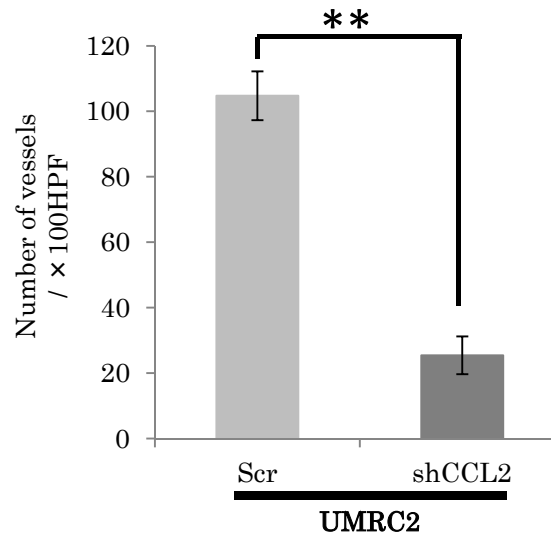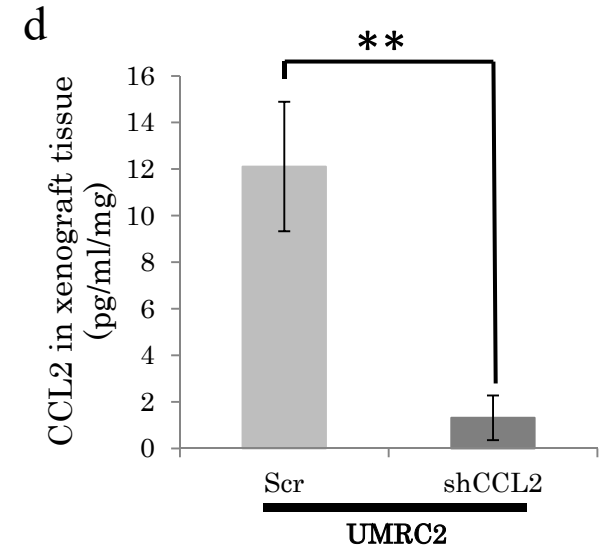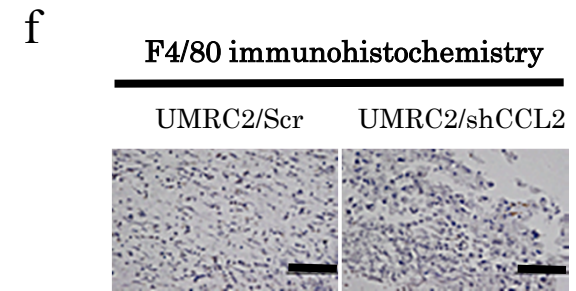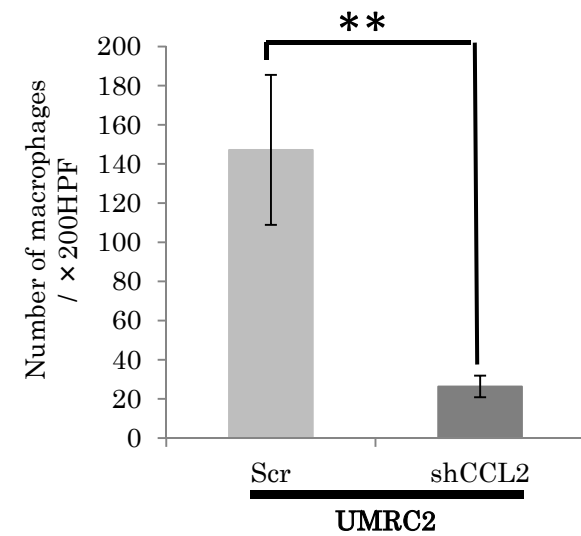

Figure S5

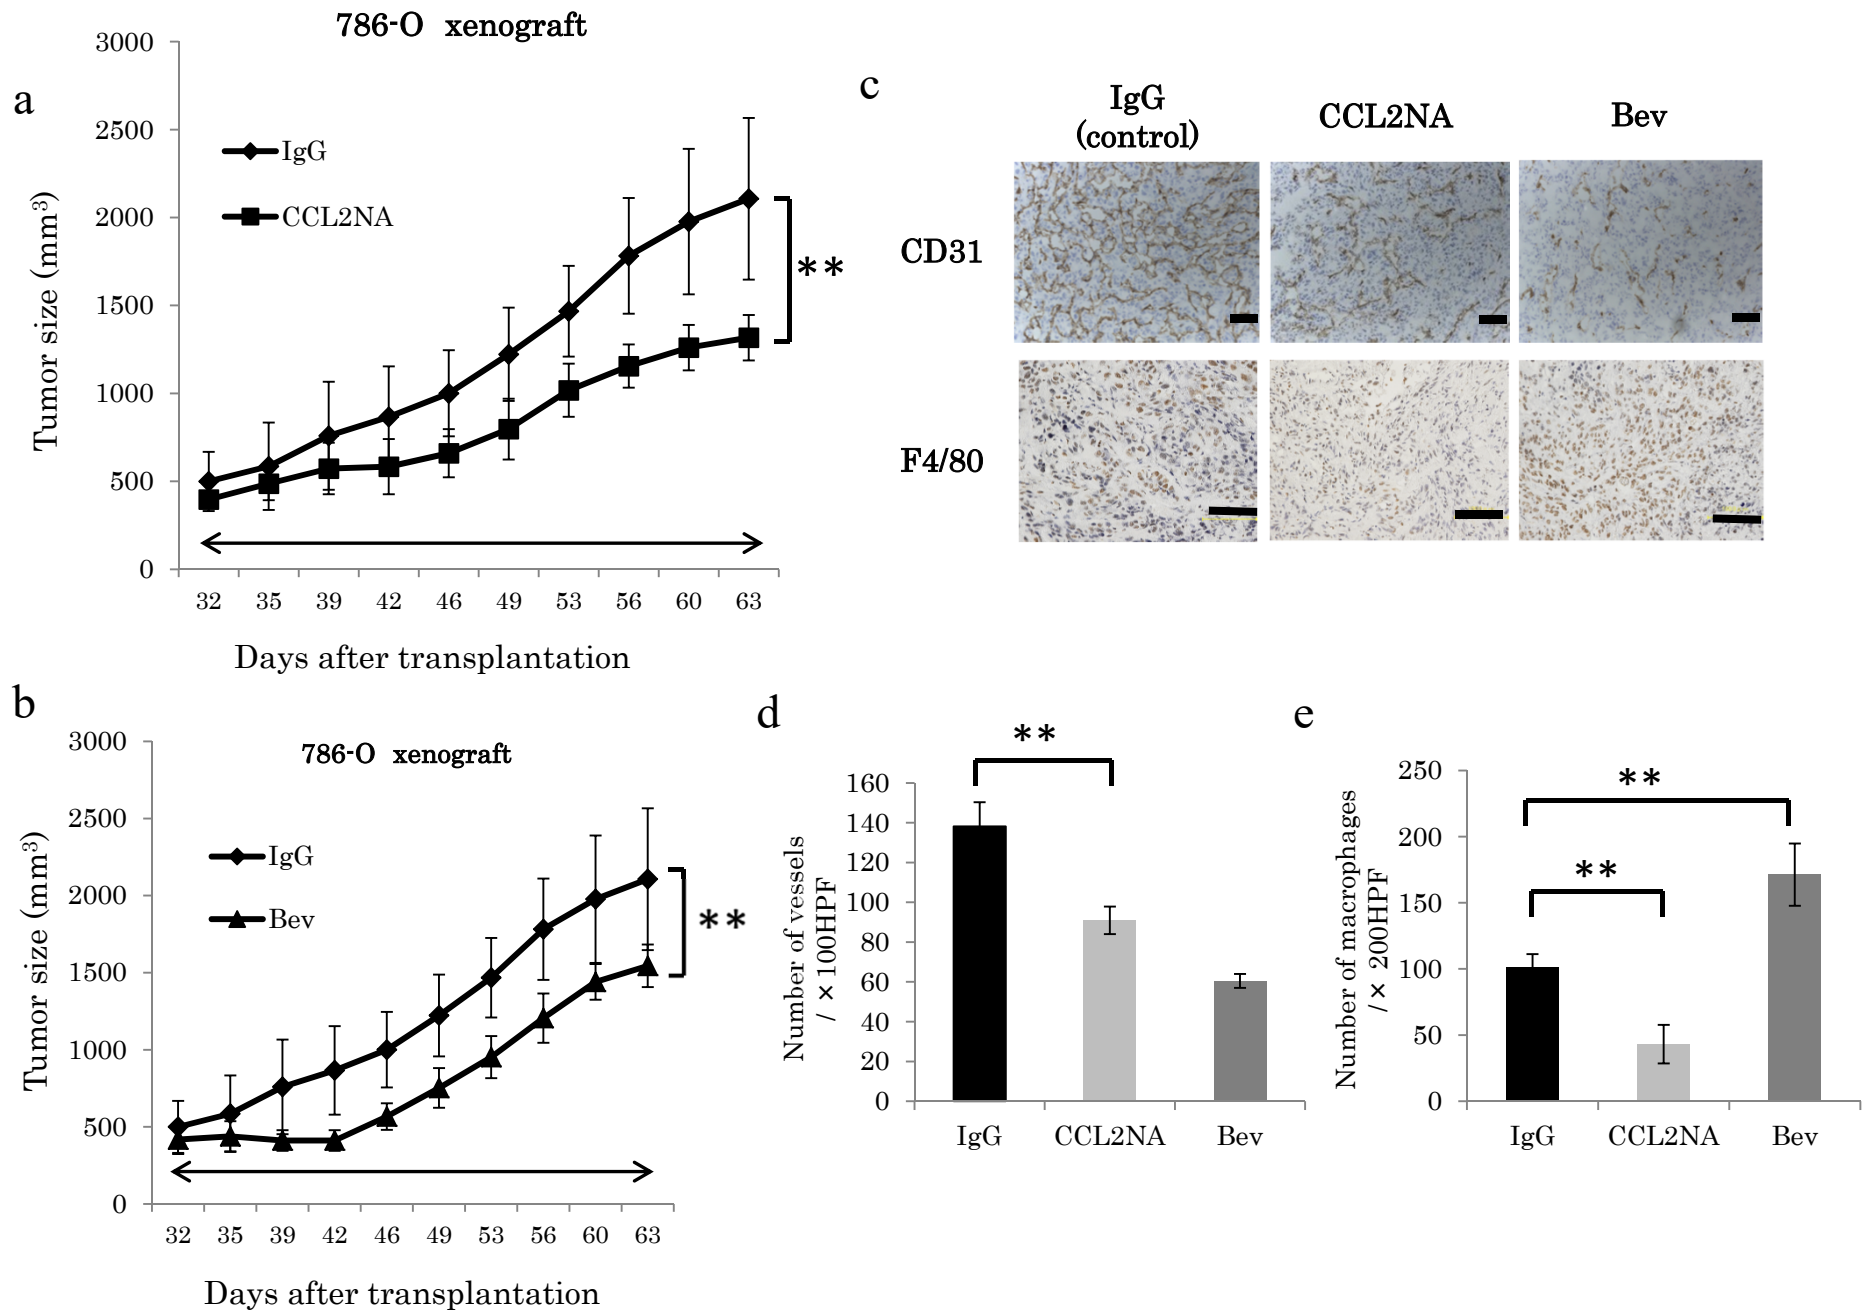

Figure S6

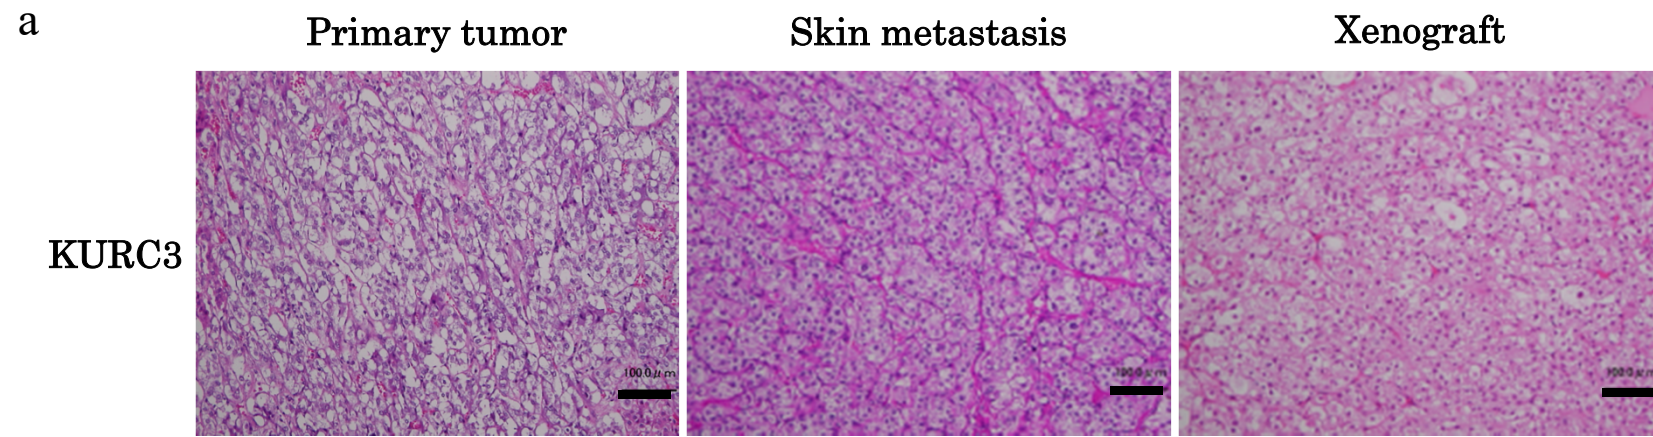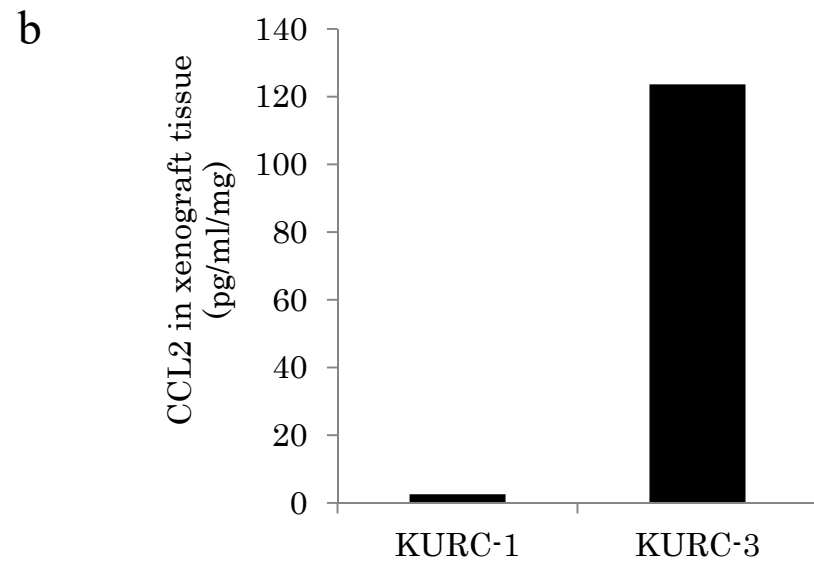

Figure S7

WT8 CCL2 xenograft

F4/80

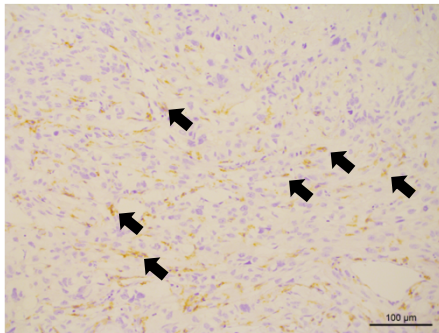

MRC1/CD206

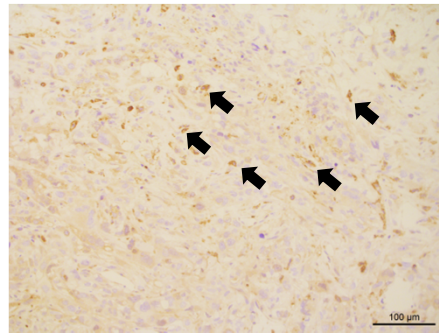

Arginase 1

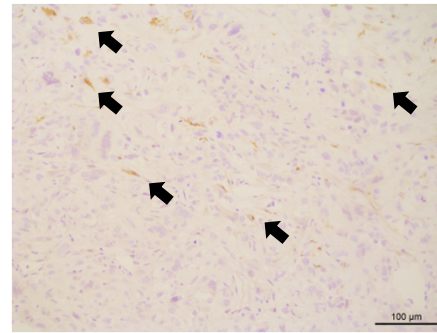

iNOS

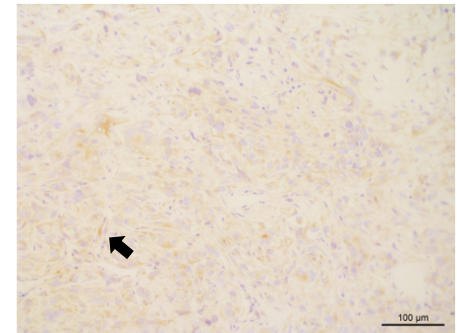

Supplement: CAM4-5-2920-s001.pdf [file CAM4-5-2920-s001.pdf]
